# Supplementary material for: Springboard to an academic career—A national medical student research program
Source: PLoS One. 2018 Apr 30;13(4):e0195527. doi: 10.1371/journal.pone.0195527 (PMC5927424; doi:10.1371/journal.pone.0195527)
Supplement: S1 Dataset — (XLSX) [file pone.0195527.s001.xlsx]

## Sheet: dataset
	s_29	s_2				s_8	s_12	s_17					s_8_1	s_13	s_14	s_9	s_11	s_19		s_28	s_33
MSRP status	MD degree	Sex				#papers first author	#papers second author	#papers co-author					Research stay abroad>3 months	PhD degree	#months from MD to PhD degree	Part of PhD program	Ambition to get a PhD degree	Currently in residency		Main position	Ambitions for academic career
1	1	2				4	6	1					2	1	12			1		1	3
1	1	1				2							2	2		2	1	1		1	1
1	1	2				2	6	6					2	2		1					2
1	1	1				2	1	2					1	1	32			1		1	1
1	1	2				1
1	1	2											2	2		1		2		4	1
1	1	2				1							2	2		2	1	1		1	3
1	1	2											2	2		2	1	1		1	2
1	1	2				1		2					1	2		1		1		1	1
1	1	2				3							2	1	12						1
1	1	1				4	1	1					1	1	24			1		1	1
1	1	1				3	3	1					2	1	52						1
1	1	1				4	3	1					2	1	28			1		1	1
1	1	2				4	6	1					2	1	60			1		1	1
1	1	1				2
1	1	2				4	2	2					1	1	3			1		1	1
1	1	2				1	6	6					2	2		2	2	1		1	2
1	1	1				3							2	1	42			1		6	3
1	1	2				1	6	6					2	2		2	1	1		1	3
1	1	1				3		2					2	2		1		1		2	3
1	1	2											2	2		2	3	2		9	3
1	1	2				4		1					2	1	15			1		1	3
1	1	1				7	3	5					2	1	42			1		1	1
1	1	1				7	3	6					2	1	48			1		1	1
1	1	2				2		1
1	1	1				3		1					2	2		1		2		4	1
1	1	2				3	6	6					2	1	54			1		1	3
1	1	1				1	6	3					2	1	44			2		5	1
1	1	2				7	3	7					1	1	6			1		1	1
1	1	2				2	1	2					2	1	26						1
1	1	2				4	7	3					2	1	12			1		1	1
1	1	2				7	7	2					2	1	5			2		5	1
1	1	2
1	1	2				2	4	4					2	1	40			1		2	3
1	1	2				1		1					2	2		2	3	2		2	3
1	1	1				3	1	1					2	1	56			1		3	3
1	1	2				4	3	3					1	1	81			1		1	1
1	1	1				3	1	2					2	1	20			1		1	1
1	1	2				1		3					2	2		2	1	1		3	3
1	1	1				5	2	3					2	1				1		1	1
1	1	2											2	2		2	2	1		1	2
1	1	1				6	1	2					2	2		2	1	1		2	2
1	1	2				4	1	1
1	1	1				2	3	1					2	1	54			1		5	3
1	1	2				3		1					2	1	24			2		9	3
1	1	1				3	2	6					2	1	36			1		1	1
1	1	1				2		1					2	1	36						3
1	1	2				3	1	1					1	1	48			1		1	1
1	1	1				1							2	2		2	3	1		3	2
1	1	2				1							2	2		2	3	1		1	2
1	1	1											2	2		2	2	1		1	2
1	1	1				1							2	2		1					1
1	1	2				6	1	6					2	2		2	3
1	1	2				2	6	4					2	1	3						3
1	1	1					2						2	2		2	3	1		1	3
1	1	1				1							1	2		2	3	1		3	3
1	1	2				5	1						2	1	40			1		3	1
1	1	2				3	3	6					2	2		1		1		1	3
1	1	2				2	2						2	1	48			1		1	1
1	1	2				1							2	2		2	3	1		10	1
1	1	1				5	1						2	1	65 mnd			1		1	1
1	1	1				1		1					2	2		2	1	2		1	1
1	1	2				7	7	7					2	2		1					1
1	1	1				6	1	6					2	2		2	1	2		12	1
1	1	2				3	6	2
1	1	1				6	1	1
1	1	1				1	6	6					2	2		2	3	1		1	2
1	1	1				2	1	2					2	1	54			1		1	2
1	1	2				3	1	2
1	1	2				1	2	6					2	2		1		1		4	3
1	1	2				4	1						2	1	10			1		1	2
1	1	1				1							2	2		2	1	1		1	1
1	1	2				1	2	3
1	1	1				1		2					2	2		1		1		1	1
1	1	2				3							2	2		1		1		1	2
1	1	2				7	1	7
1	1	2				4	1	4					2	1	60			1		1	3
1	1	1				4	3	7					1	1	47			1		1	1
1	1	2				1	2	1					2	2		1		1		3	3
1	1	1				4		2					2	1	81			1		1	1
1	1	1				6	6	6
1	1	2				4	1	2					2	1	5			2		12	3
1	1	1				1		3					2	2		1		1		4	3
1	1	2				2	1	1					2	2		2	1	1		2	1
1	1	1				1		2					2	2		2	3	1		1	2
1	1	2				4	2	3					2	1	6			1		2	3
1	1	2				1	6	2					2	2		1		1		4	3
1	1	2				3	3	1					1	1	60						3
2	3	1						2					1	2		1		2		4	1
2	3	2						1					2	2		1		1		4	1
2	3	1											2	2		2	3	1		3	3
1	1	2				1	1						2	2		1		1		1	3
1	1	2				5	6	1					2	1	90			1		1	3
1	1	2				3	2	4					2	1	30			1		1	3
1	1	1				2	6	6					2	2		1		2		4	1
1	1	2											2	2		2	1				1
1	1	2				1	6	6					2	2		2	1	1		3	1
1	1	1					1						2	2		2	1	1		3	3
1	1	1				7	2	7					2	1	63			2		5	1
1	1	2				3	2	2					2	1	8						1
1	1	2				1		2					2	2		1					3
1	1	1					1						2	1	32						3
1	1	1				2	1	1					2	1	41						1
1	1	2				5	3	2					2	1	60			1		1	1
1	1	2				3	3	6					2	1	57			1		1	3
1	1	2				1		1					2	2		2	1	1		1	3
1	1	1				3	2	5					2	1	48			1		1	3
1	1	2				5	2	7					1	1	1.5			1		5	1
1	1	1				4	6	4					1	1	26			1		1	1
1	1	1				3	6	6					2	2		1		2		4	1
1	1	1				2	6	7
1	1	1				2							1	2		1		2		4	3
1	1	2				4	2	6					2	1	57			1		6	1
1	1	2				4	2	7
1	1	2				7							2	1	6			1		1	1
1	1	2				1		2					2	2		2	1	2		5	1
1	1	1				5	6	6					2	1	20						1
1	1	1				4							1	1	27			1		3	3
1	1	1				2	1						2	2		1		1		1	3
1	1	1				1							2	2		2	3	1		3	3
1	1	1											2	2		2	1	1		1	1
1	1	2				7	3	7					1	1	24			1		3	3
1	1	1											2	2		1					3
1	1	2				1	5	5						2		1		1		1	1
1	1	1				1	1	1					2	2		1					1
1	1	1				3							2	2		1		1		4	3
1	1	2				3		7					1	1	18			1		1	1
2	3	2				1	6	6					2	2		2	1	1		1	1
2	2	1											2	2		2	3	1		1	3
2	2	2				2	1	7					1	2		1		2		6	1
2	2	1											2	2		2	2	1		3	3
2	2	2											2	2		2	2	1		1	2
2	2	2				6	6	6					2	2		1					1
2	2	1											2	2		2	2	1		1	3
2	2	1											2	2		2	1	1		2	3
2	2	1											2	2		2	3	1		10	3
2	2	2											2	2		2	2	1		3	2
2	2	1											2	2		2	3	1		1	2
2	1	1											2	2		1		2		4	1
2	2	2					1						2	2		2	3	2		12	3
2	2	1											2	2		2	3	1		1	2
2	2	1											2	2		2	3	1		1	3
2	2	1											2	2		2	1	1		1	3
2	2	1											2	2		2	1				3
2	2	1											2	2		2	3	1		3	3
2	2	2											2	2		2	1	1		1	2
2	2	2				6	2						2	2		2	3	1		13	3
2	2	2				6	6	1					2	2		2	2	1		1	2
2	2	1				1							2	2		2	3	1		1	3
2	2	1											2	2		2	3	1		3	3
2	2	1											2	2		2	3	1		1	3
2	2	1											2	2		2	1	1		1	3
2	2	2											2	2		2	3	1		3	3
2	2	2											2	2		2	2	1		1	2
2	2	2					1						2	2		1		1		4	3
2	2	2											2	2		2	1	1		1	1
2	2	1											2	2		2	3	1		1	3
2	2	1											2	2		2	1				3
2	2	2											2	2		2	1	1		1	1
2	2	2											2	2		2	1	2		10	3
2	2	2											2	2		2	1				1
2	2	2											2	2		2	1	1		1	3
2	2	1											2	2		2	3	1		1	3
2	1	2				5	1	6					2	1	40			1		13	1
2	2	1				1		6					2	2		2	1	1		1	1
2	2	1
2	2	2				6	3	1
2	2	2											2	2		2	3	1		1	3
2	2	1						1					2	2		2	1	1		1	1
2	2	1											2	2		2	3	2		7	2
2	2	1											2	2		2	3	1		3	1
2	2	1											2	2		2	1	1		1	3
2	2	1				2	6						1	2		1		2		4	1
2	2	1				2							2	2		1		2		4	3
2	2	1											2	2		2	2	1		1	3
2	2	2				1	1	6					2	2		2	1				1
2	2	1											2	2		2	3	1		3	3
2	2	2				1	6	6					1	2		1		1		4	1
2	2	2				2	1	1					2	1	48						3
2	2	1				7	3	7					1	1	5			1		5	1
2	2	1											2	2		2	3	1		3	2
2	2	2											2	2		2	2	1		1	2
2	2	1											2	2		2	2	1		1	2
2	2	1											2	2		2	3	1		1	3
2	2	1											2	2		2	3				2
2	2	1				1	1	6					2	2		2	3	1		1	2
2	2	2				1	1	2					2	2		1					1
2	2	2				2	6	2					2	2		1		1		4	1
2	2	1				6							2	2		2	1	1		1	1
2	2	1				1							2	2		1		2		4	3
2	2	1
2	2	2											2	2		2	3	1		1	3
2	2	2				7	7	7					1	1	46			1		5	1
2	2	2				3	2
2	2	1											2	2		2	2	2		7	3
2	2	1				7	7	7					1	1	79			1		1	1
2	2	1											2	2		2	3				3
2	2	2											2	2		2	2	1		1	3
2	2	2				1							2	2		2	3				2
2	2	2											2	2		2	1	1		1	3
2	2	1											2	2		2	1	1		1	1
2	2	2				2	1						2	2		1		1		1	1
2	2	2											2	2		2	3	1		1	3
2	2	1											2	2		2	3	1		1	3
2	2	2											2	2		2	2	2		9	2
2	2	1											2	2		2	3	1		1	3
2	2	1				1							2	2		2	3	1		3	3
2	2	1											2	2		2	2	1		1	3
2	2	1											2	2		2	3	1		1	3
2	2	1											2	2		2	1				1
2	2	1											2	2		2	3	1		1	3
2	2	2											2	2		2	2				2
2	2	1											2	2		2	3	1		1	3
2	2	2				1	6	6					2	2		2	3				3
2	2	2											2	2		2	3	1		10	3
2	2	1											2	2		2	1	1		1	3
2	2	2					1						2	2		2	1	1		1	1
2	2	2											2	2		2	3	1		1	3
2	2	2				1							2	2		2	3	1		1	3
2	2	2											2	2		2	1	2		2	3
2	2	1											2	2		1		1		4	1
2	2	1				6	6	2					2	2		1		1		4	1
2	2	2				6	1	6					2	2		2	3	1		3	3
2	2	1											2	2		2	3	1		1	2
2	2	2											2	2		2	3	1		1	3
2	2	2											2	2		2	1	1		1	3
2	2	2											2	2		2	3	1		1	3
2	2	1											2	2		2	3				3
2	2	2											2	2		2	2				2
2	2	1											2	2		2	3	1		1	3
2	2	2				3
2	2	1											2	2		2	1	1		1	1
2	2	1				6	6	6					2	2		2	3				3
2	2	1											2	2		2	1	1		1	3
2	2	2											2	2		2	2	1		1	2
2	2	2											2	2		2	2	1		1	2
2	2	2											2	2		2	3	1		3	3
2	2	1											2	2		2	3	1		2	3
2	2	1				1							2	2		1		1		4	3
2	2	2											2	2		2	1	1		3	3
2	2	2					6	2
2	2	1											2	2		2	3	1		1	2
2	2	1											2	2		1		2		4	3
2	2	1											2	2		2	3	1		1	3
2	2	2				3	1	1					2	2		1		1		13	3
2	2	1											2	2		2	1	1		12	2
2	2	2											2	2		2	1	1		3	3
2	2	1				3	2	5					2	1	68			2		5	3
2	2	1											2	2		2	3	2		13	3
2	2	2				1	6	6					2	2		2	1	1		1	1
2	2	2												2		2	3	1		3	3
2	2	2				6	6	6					2	2		1		1		4	1
2	2	1											2	2		2	3	1		1	2
2	2	2				6							2	2		2	2	1		3	2
2	2	1											2	2		2	1	1		1	2
2	2	1				1	6	6					2	2		2	3	1		1	3
2	2	1											2	2		2	3	1		1	2
2	2	2				1							2	2		2	1	1		1	3
2	2	2											2	2		2	1	1		1	2
2	2	1				6	1	6					2	2		2	2	1		3	3
2	2	2											2	2		2	2	1		2	2
2	2	2				6	6	6					2	2		1		1		4	3
2	2	1											2	2		2	3	1		1	1
2	2	2											2	2		2	1	2		2	3
2	2	2											2	2		2	2	1		1	2
2	2	2											2	2		2	1	1		1	1
2	2	2				1	6	7					2	2		2	1				1
2	2	2											2	2		2	3				2
2	2	1				1	6	6					2	2		1		2		4	1
2	2	1											2	2		2	1				3
2	2	1											2	2		2	3	1		3	1
2	2	1				1	2	7					2	2		1		2		4	2
2	2	2											2	2		2	1	1		1	3
2	2	1											2	2		2	2	1		1	2
2	3	2				6	6	6					2	2		1		1		3	3
2	2	1											2	2		2	3	1		1	2
2	2	2											2	2		2	2	1		2	1
2	2	2											2	2		2	1	1		1	1
2	2	1											2	2		2	2	1		1	2
2	2	2											2	2		2	1	1		1	3
2	2	2											2	2		2	1	1		1	1
2	2	2											2	2		2	3	1		1	3
2	2	1											2	2		2	3	1		1	3
2	2	1				1	6	6					2	2		1		1		1	2
2	2	1											2	2		2	1	1		1	3
2	2	2											2	2		2	2	1		2	2
2	2	2				5	6	6					2	2		2	1	1		1	1
2	2	1											2	2		2	3				3
2	2	1											2	2		2	3	1		1	3
2	2	1											2	2		2	3	1		1	2
2	2	1											2	2		2	2	1		1	3
2	2	2											2	2		2	1	2		10	1
2	2	2				1							2	2		2	1	1		10	2
2	2	1											2	2		2	3	1		13	2
2	2	1											2	2		2	1	1		1	1
2	2	2											2	2		2	1	1		2	1
2	2	2											2	2		2	1	1		1	2
2	2	1											2	2		2	3	1		13	2
2	2	1											2	2		2	3	2		2	3
2	2	2				3	3	2					2	2		1					1
2	2	1					1	3					2	2		2	1	1		1	3
2	2	1											2	2		2	3	2		2	2
2	2	2				1	1	6
2	2	2											2	2		2	1	1		1	1
2	2	1											2	2		2	1	2		10	3
2	2	2											2	2		2	1	1		1	3
2	2	2											2	2		2	1				1
2	2	2					1						2	2		2	2	2		2	2
2	2	2											2	2		2	1				2
2	2	1											2	2		2	3				2
2	2	1											2	2		2	1				2
2	2	1
2	2	2				1							2	2		2	1	1		1	1
2	2	2											2	2		2	3	2		3	3
2	2	2											1	2		2	1				3
2	2	1											2	2		2	3	1		3	3
2	2	1				1	6	6					2	2		2	3	1		1	2
2	2	2				1	6	6					2	2		2	3	1		1	3
2	2	1											2	2		2	3	1		1	3
2	2	2				6	3	6					2	2		2	1	1		1	3
2	2	1											2	2		2	3	1		1	3
2	2	2				1							2	2		2	1	1		1	1
2	2	2				1	6	6					2	2		1		1		4	1
2	2	2											2	2		2	1				3
2	2	2				1	6	6					2	2		2	2				3
2	2	2											2	2		2	3				3
2	2	2				1	6	6					2	2		2	1	1		1	1
2	2	2											2	2		1		1		1	3
2	2	2				1	6	1					2	2		2	1	1		1	3
2	2	2				7	6	2					2	1	82			1		1	1
2	2	1											2	2		2	1	1		1	2
2	2	2				1							2	2		2	3	1		1	3
2	2	2				1	6	6					2	2		2	1	1		1	3
2	2	2				1	6	6					2	2		1		1		4	1
2	2	1				1							2	2		1		1		1	2
2	2	2											2	2		2	1	1		2	1
2	2	1											2	2		2	1	1		1	2
2	2	1											2	2		2	1	1		1	1
2	2	2					1						2	2		2	1	1		1	3
2	2	1				6	6	1					1	2		2	1	1		1	3
2	2	1											2	2		2	2	1		1	2
2	2	1											2	2		2	2	1		3	2
2	2	2				4	4	3					1	1	75			1		1	1
2	2	2											2	2		2	1	1		4	3
2	2	1				3		2
2	2	2											2	2		2	1	1
2	2	1											2	2		2	1	1		1	1
2	2	2				1	6	6					2	2		2	3	1		1	3
2	2	1											2	2		2	3	2		10	2
2	2	1					1
2	2	2				1							2	2		2	1	1		1	3
2	3	1
2	2	2											2	2		2	1	1		1	1
2	2	1				1	6	6					2	2		2	1	1		10	3
2	2	2						6					2	2		2	3				2
2	2	1											2	2		2	1	1		1	1
2	2	1											2	2		2	2	1		1	2
2	2	2				4	2	7					1	2		1		2		4	1
2	2	1				1	2	6					2	2		1		2		4	1
2	2	2											2	2		2	1	1		1	3
2	2	1											2	2		2	2	1		3	2
2	2	2				6	6	6					2	2		2	2	1		1	2
2	2	2											2	2		2	3	1		1	2
2	2	1
2	2	2											2	2		2	3	1		1	3
2	2	2											2	2		2	3	1		1	1
2	2	2				1							2	2		2	1	1		1	1
2	2	1				1							2	2		2	1	1		1	2
2	2	2											2	2		2	2	1		3	2
2	2	1
2	2	2											2	2		2	1	1		1	3
2	2	2				2	6	1					2	2		1		1		4	1
2	2	1					1						2	2		2	3	1		1	3
2	2	2											2	2		2	3	2		12	2
2	2	2
2	2	1				1	6	6					2	2		2	3	1		1	3
2	2	2											2	2		2	1	1		1	2
2	2	1											2	2		2	3				3
2	2	1				2	6	6					2	2		2	1				1
2	2	1					1						2	2		2	1				3
2	2	1											2	2		2	3				2
2	2	2											2	2		2	3				3
2	2	1											2	2		2	1				2
2	2	1											2	2		2	3	1		13	2
2	2	2											2	2		2	1	1		13	3
2	2	1											2	2		2	2	1		10	2
2	2	1											2	2		2	1				3
2	2	2											2	2		2	1	1		1	1
2	2	2											2	2		2	1				1
2	2	1											2	2		2	3				3
2	2	1											2	2		2	3				3
2	2	2				1
2	2	2						1					2	2		2	1				1
2	2	2				6	6	1					1	2		2	3				3
2	2	1											2	2		2	1				3
2	2	2											2	2		2	2	1		3	2
2	2	1											2	2		2	1				1
2	2	2											2	2		2	1	1		1	1
2	2	1											2	2		2	1				3
2	2	2				2	6	2
2	2	1											2	2		1					1
2	2	1											2	2		2	1				1
2	2	2				4	1	1					2	1	-24			1		1	1
2	2	2											2	2		2	1	1		15	1
2	2	2											2	2		2	1				3
2	2	2											2	2		2	3				3
2	2	2				5	3	1					2	1	96			1		1	1
2	2	2											2	2		2	1	1		3	3
2	2	2											2	2		2	2				2
2	2	1											2	2		2	3	1		1	1
2	2	2											2	2		2	3	1		1	3
2	2	1				6	6	1					2	2		2	3	2		2	3
2	2	1				1							1	1	80			1		3	3
2	2	1											2	2		2	2	1		13	2
2	2	1											2	2		2	1	1		3	3
2	2	1												2		2	3	1		1	2
2	2	1											2	2		2	1	1		1	1
2	2	1				1	1	1					2	2		1					1
2	2	1				1	6	2					2	2		2	3	1		1	3
2	2	2											2	2		2	1	1		1	1
2	2	2											2	2		2	3	1		3	2
2	2	1											2	2		2	1	1		1	1
2	2	1											2	2		2	1	2		7	1
2	2	2				1	6	6					2	2		1		1		1	1
2	2	2											2	2		2	2	1		3	2
2	2	2											2	2		2	3	1		3	3
2	2	2											2	2		2	1	1		1	1
2	2	1											2	2		2	1	1		1	3
2	2	2											2	2		2	1	1		1	1
2	2	2											2	2		2	2	1		3	2
2	2	1											2	2		2	2	1		1	3
2	2	2				6	6	6					2	2		2	1	1		1	3
2	2	2											2	2		2	2	1		1	2
2	2	2											2	2		2	2	1		1	2
2	2	1											2	2		2	1	1		1	3
2	2	2											2	2		2	3	1		1	3
2	2	2				1	6	6					2	2		1		1		1	1
2	2	2						1					2	2		2	1	1		1	1
2	2	2											2	2		1		1		4	3
1	1	1				1	1	6					1	1	36			1		1	1
1	1	1				1	6	6					2	2		2	1	1		1	1
1	1	2				6	1						2	1	21						1
1	1	2				1	6	6					2	2		1					3
1	1	2				1							2	2		2	3	1		3	2
1	1	2				1	6	6					2	2		1					1
1	1	1				1	1						1	2		1					1
1	3	2				1							2	2		2	3				3
1	1	2				2	1	2					2	2		1					3
1	1	1											2	2		2	1				2
1	1	1											2	2		2	1	1		3	1
1	1	1											2	2		2	3				1
1	1	2											2	2		2	1				1
1	1	2				1	6	6					2	1	24			1		1	1
1	1	2
1	1	2				1	6	6					2	2		1		2		4	1
1	1	1				1	1	6					2	2		2	1	1		3	1
1	1	2											2	2		2	1	1		1	1
1	1	1				1	6	1					2	2		1					1
1	1	1				1	1	2					2	2		1					1
1	1	1				1	6	6					2	2		2	1				1
1	1	1					1	2					2	2		1					1
1	1	2
1	1	2											2	2		2	1				1
1	1	2				1							2	2		1					1
1	1	1				6	6	1					2	2		1		2		4	3
1	1	1				2		1					2	1	14						1
1	1	1				1							2	2		1					3
1	1	2				1	6	6					2	2		1					1
1	1	2				4
1	1	1				3	6	2					2	1	0			1		1	1
1	1	2				4							2	2		1					3
1	1	1											2	2		1					3
1	1	2				2							2	1	19						1
1	1	1				1	6	3					2	2		1		1		1	1
1	1	2											2	2		1					3
1	1	2											2	2		2	1				1
1	1	2				1	1						2	2		1					3
1	1	2				4	3	3
1	1	1				1	6	6					2	1	14			1		1	1
1	1	1											2	1							3
1	1	1						1					2	2		1		2		4	1
1	1	1				3	6	1					2	1	7						3
1	1	2				2	1						2	2		1					3
1	1	1				4							2	1	0						1
1	1	1
1	1	1				6	6	1					2	2		2	3				3
1	1	1											2	2		1					3
1	1	1				2	6	6					2	2		1					2
1	1	2				2
1	1	2				3	2
1	1	2				1	6	6					2	2		1					1
1	1	1				1	1	3
1	1	1				2	6	6					2	1	10						1
1	1	1				1	1	6					2	2		1					1
1	1	1				1							2	2		2	1	1		1	3
1	1	2											2	1	11						3
1	1	2				2							2	2		1					1
1	1	1				1	1						2	2		2	1	1		3	3
1	1	2											2	2		2	3				2
1	1	1				2		2					2	1	10						1
1	1	1											2	2		2	3	1		1	3
1	3	2											2	1	8			1		1	1
2	3	1				1	6	6					2	2		2	3	1		3	3
1	3	2											2	2		2	1	1		15	3
2	3	1											2	2		2	1	1		3	3
1	1	1				5	1	2					2	1	12			1		1	1
1	3	1											2	2		2	1	1		1	1
1	3	2											2	2		2	1	1		1	1
1	3	2											2	2		2	1				3
1	3	1											2	2		2	3	1		10	2
1	1	2
1	1	1											2	2		2	3	1		1	3
1	1	2				1							2	2		2	3	1		1	2
1	1	2				1	1						2	1	10			1		1	1
1	1	2				1	6	1					1	2		2	3				1
1	1	2						1					2	2		1		2		4	1
1	1	2											2	2		2	3	1		3	3
1	1	2					2						2	2		1		2		4	1
1	1	2
1	1	2											2	2		1		2		4	1
1	1	1				4		5					2	1	0.5			1		1	1
1	1	1				2	2	1					2	2		1					2
1	1	1				2	6	6					2	2		1					3
1	1	2				1							2	2		1		2		4	3
1	1	2											2	2		1					1
1	1	1				2		1					2	2		1					1
1	1	2				2		1
1	1	1											2	2		2	3				3
1	1	1											2	2		2	1	1		1	1
1	1	2											2	2		1					1
1	1	2											2	2		1					2
1	1	1				6	1	6					2	2		2	3	2		9	3
1	1	1				5		2
1	1	1				1	6	1					2	2		1					1
1	1	1				3	6	2					2	1	18						1
1	1	2				1	3						2	1	10			1		1	1
1	1	1				1	6	1
1	1	2				1	6	6					2	2		2	1				1

## Sheet: Legends
MSRP status
	1 Yes
	2 No (Control)
MD degree
	1 Yes
Sex	2 No
Year of birth
Start of MD education
year of MD degree
#papers first author
#papers second author
#papers co-author
Research stay abroad>3 months
	1 Yes
	2 No
PhD degree
	1 Yes
	2 No
#months from MD to PhD degree
Part of PhD program
	1 Yes
	2 No
Ambition to get a PhD degree
	1 Yes
	2 No
Currently in residency
	1 Yes
	2 No
Year when residency started
Main position
	0 Internship
	1 residency
	2 Consultant
	3 Primary care physician with governmental support
	13 Primary care physician without governmental support
	15 Specialist with governmental support
	16 Specialist without governmental support
	4 PhD student
	5 Postdoctoral fellow
	6 Permanent academic position
	7 Unemployed, temporary
	8 unemployed, permanent
	9 non-medical work
	10 Main postion public physician
	11 Main position, non-physician
	12 Main position, private practice doctor
Ambitions for academic career
	1 Yes
	2 No
Overall status - New
Overall status - Distributed
Overall status - some responses
Overall status - completed
Overall status - missing data
Name_investigation
